# Supplementary material for: In-depth study of the formation processes of single atmospheric particles in the south-eastern margin of the Tibetan Plateau
Source: Copernicus journal article supplement (doi:10.5194/acp-23-9597-2023), 2023-08-30
Supplement: Supplementary file 1 [file acp-23-9597-2023-supplement.pdf]

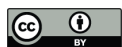

*Supplement of*

## **In-depth study of the formation processes of single atmospheric particles in the south-eastern margin of the Tibetan Plateau**

**Li Li et al.**

*Correspondence to:* Qiyuan Wang (wangqy@ieecas.cn) and Junji Cao (jjcao@mail.iap.ac.cn)

The copyright of individual parts of the supplement might differ from the article licence.

## 1 **S1. Characteristics of particle composition**

2 Nine particle groups are identified based on their chemical characteristics shown  
3 in the publication. General mass spectral characteristics for each particle group are  
4 presented in Fig. S3. The intense potassium ( $^{39}\text{K}^+$ ) peak in almost all particles is  
5 attributed to the highly sensitive to potassium with the desorption laser used in the  
6 SPAMS (Gross et al., 2000; Xu et al., 2017; Giorio et al., 2015). Studies have  
7 reported that  $^{39}\text{K}^+$  by itself isn't an adequate marker for biomass burning because it  
8 presents in mass spectra of a variety of particle types (Healy et al., 2013). Moreover,  
9 the peak at  $m/z$  39 might not be for  $\text{K}^+$  and also for organic fragment  $\text{C}_3\text{H}_3^+$  (Silva and  
10 Prather, 2000). Especially, the presence of other potassium clusters (i.e.,  $m/z$   $^{113}\text{K}_2\text{Cl}^+$   
11 or  $m/z$   $^{213}\text{K}_3\text{SO}_4^+$ ) and peaks at  $m/z$   $^{45}\text{CHO}_2^-$ ,  $^{59}\text{C}_2\text{H}_3\text{O}_2^-$  and  $^{71}\text{C}_3\text{H}_3\text{O}_2^-$  are distinctive  
12 for biomass burning particles (Silva et al., 1999; Dall'Osto et al., 2012). The  
13 combination of the presence of phosphate ( $m/z$   $^{79}\text{PO}_3^-$ ) allows identification of  
14 particles derived from traffic emissions.

15 Particles containing the strongest  $\text{K}^+$  ( $m/z$   $^{39}\text{K}^+$ ) signal in the positive mass  
16 spectrum (MS), coexistence significant sulfate ( $m/z$   $^{97}\text{HSO}_4^-$ ) and nitrate ( $m/z$   $^{46}\text{NO}_2^-$ ,  
17  $^{62}\text{NO}_3^-$ ) fragments in the negative MS are identified as Potassium-rich (K-rich) (Fig.  
18 S3a). The sources of the K-rich particles are complex, including biomass burning  
19 (Pratt et al., 2011), secondary formation (Bi et al., 2011; Shen et al., 2017), industrial  
20 and traffic emissions (Zhang et al., 2017). A weak phosphate ( $m/z$   $^{79}\text{PO}_3^-$ ) signal can  
21 be seen in Fig. S3a, while a study supported that  $^{79}\text{PO}_3^-$  could be originated from  
22 motor vehicle lubricants (Yang et al., 2017). Significant peaks of  $^{97}\text{HSO}_4^-$  and  $^{62}\text{NO}_3^-$   
23 indicate that the K-rich particle might also experience atmospheric aging. The  
24 particles containing levoglucosan fragments ( $^{45}\text{CHO}_2^-$ ,  $^{59}\text{C}_2\text{H}_3\text{O}_2^-$ ,  $^{71}\text{C}_3\text{H}_3\text{O}_2^-$ ,  
25  $^{73}\text{C}_3\text{HO}_3^-$ ) and  $^{113,115}\text{K}_2\text{Cl}^+$  signals in Fig. S3b are defined as Biomass burning (BB)  
26 (Moffet et al., 2008). Organic carbon (OC) particles (Fig.S3c) have strong organic  
27 fragments (such as  $m/z$   $^{27}\text{C}_2\text{H}_3^+$ ,  $^{37}\text{C}_3\text{H}^+$ ,  $^{43}\text{C}_2\text{H}_3\text{O}^+$  and  $^{51}\text{C}_4\text{H}_3^+$ ) in the positive MS,  
28 generally from biomass burning and VOCs transformation (Moffet et al., 2008; Bi et  
29 al., 2011). Strong  $^{97}\text{HSO}_4^-$  and  $^{62}\text{NO}_3^-$  signals in the negative MS represent that the

30 particles have experienced a certain degree of aging in the atmosphere. In addition,  
31  $^{79}\text{PO}_3^-$  in the negative MS demonstrates the OC is also contributed by traffic  
32 emissions. However, the larger molecular weight ions ( $m/z$  -129, -143) contained in  
33 OC negative MS cannot be well interpreted, potentially ascribed to the presence of  
34 organosulfates (Hatch et al 2011; Cahill et al., 2012). Notably different from other  
35 types of particle, Ammonium particle contains apparent ammonium ions ( $m/z$   $^{18}\text{NH}_4^+$ )  
36 and amine ( $m/z$   $^{58}\text{C}_2\text{H}_5\text{NHCH}_2^+$ ) in the positive MS (Fig. S3d), and strong  $^{97}\text{HSO}_4^-$   
37 signals in the negative MS. The presence of sulfuric acid ( $m/z$   $^{195}\text{H}(\text{HSO}_4)_2^-$ )  
38 fragments indicates that ammonium is an acidic particle (Rehbein et al., 2011; Lin et  
39 al., 2017). There are a variety of sources of ammonium, including sewage treatment,  
40 animal husbandry, waste incineration, the marine environment, biomass burning,  
41 industrial processes, and vehicle exhaust (Cadle and Mulawa, 1980; Moffet et al.,  
42 2008). Moreover, its gaseous precursor of ammonia ( $\text{NH}_3$ ) could be converted into  
43 secondary aerosols such as ammonium sulfate/nitrate (Seinfeld and Pandis, 2012;  
44 Yang et al., 2012). In this study, ammonium particles show negligible  $^{62}\text{NO}_3^-$   
45 fragment in the negative MS due to ammonium nitrate being much more volatile and  
46 less easily transported than ammonium sulfate (Lall and Thurston 2006; Sun et al.  
47 2012; Xu et al., 2018). These results possibly suggest that ammonium particles have  
48 undergone intense atmospheric aging during regional transport. Element carbon (aged  
49 EC) particles are characterized by the obvious signals of carbon cluster ions (e.g.,  $m/z$   
50  $^{12}\text{C}^\pm$ ,  $^{24}\text{C}_2^\pm$ ,  $^{36}\text{C}_3^\pm$ ,  $^{48}\text{C}_4^\pm$ ,  $^{60}\text{C}_5^\pm$ , etc.) and  $^{39}\text{K}^+$  and  $^{97}\text{HSO}_4^-$ , and also few relatively  
51 weak organic fragments ( $m/z$   $^{27}\text{C}_2\text{H}_3^+$ ,  $^{43}\text{C}_2\text{H}_3\text{O}^+$ ) (Fig. S3e) (Moffet and Prather,  
52 2009). The EC-containing particles mainly originated from coal combustion (Bond et  
53 al., 2013) and vehicle emissions (Yang et al., 2017). The presence of  $^{97}\text{HSO}_4^-$  also  
54 indicates the aging of the particles. Dust particles mainly contain mineral ions signals  
55 in MS (Fig. S3f), such as  $m/z$   $^{27}\text{Al}^+$ ,  $^{40}\text{Ca}^+$ ,  $^{56}\text{CaO}^+/\text{Fe}^+$ ,  $^{16}\text{O}^-$ ,  $^{17}\text{OH}^-$ ,  $^{76}\text{SiO}^-$ , and  $^{79}\text{PO}_3^-$ .  
56 Different from other particles, the dust particle has no obvious signal of  $^{97}\text{HSO}_4^-$  and  
57  $^{62}\text{NO}_3^-$ . This could be explained by the dust being much fresh from the local  
58 road/construction fly ash or dust events. The characteristic ions of NaK-SN, metal,

59 and other particles are listed in Table 1 and Fig. S3(g,h,i), respectively. Due to their  
60 relatively low contributions ( $< 3\%$ ), their recognition is not discussed in detail.  
61

## 62 **S2. The spatial distribution for the six major particle types**

63 The potential source contribution function (PSCF) model was applied to further  
64 identify the spatial distribution of the pollution sources for the six major particle types.  
65 For the K-rich and OC particles (Fig. S16), the large fractions in the southwest of  
66 Gaomeigu are potentially influenced by biomass burning and traffic emissions, such  
67 as the two nearby highways [the Xili Expressway (G0613) and Dali Expressway  
68 (G5611)] (Fig. S17). As shown in Fig. S16, the high PSCF values of BB particle are  
69 found along Sino-Burmese border and the sampling surroundings. Compared with  
70 intensive fire activities (Fig. S18), the contribution of biomass burning particles from  
71 long-distance regional transport may be underestimated due to the emitting of  
72 levoglucosan ( $^{45}\text{CHO}_2^-$ ,  $^{59}\text{C}_2\text{H}_3\text{O}_2^-$ ,  $^{71}\text{C}_3\text{H}_3\text{O}_2^-$ ,  $^{73}\text{C}_3\text{HO}_3^-$ ) from biomass burning will  
73 decay or even vanish during the atmospheric aging processes (Pratt et al., 2011; Li et  
74 al., 2014). Tian et al (2022) also suggested that BBOA was partly aged at Gaomeigu.  
75 A higher PSCF value of Ammonium particles is seen in the cross-border of northern  
76 Myanmar than in the center of Gaomeigu, representing more influences by  
77 transportation than the local emission. Owing to the low consumption of coal in the  
78 southeastern Tibet Plateau (Li et al., 2016), the high PSCF values of aged EC particles  
79 are more likely from the traffic emissions (Fig. S16). Moreover, sporadic high PSCF  
80 values of the aged EC particles are also found in cross-border northern Myanmar,  
81 indicating possible influences of biomass burning emissions (Liu et al., 2021). The  
82 high PSCF values of Dust particles are observed in the surrounding areas of the  
83 southwestern sampling site.

84 Table S1. Number concentration and relative fraction of the six main particle types in four  
 85 trajectory clusters during the whole observation.

| Type     | Cluster 1 |              | Cluster 2 |              | Cluster 3 |              | Cluster 4 |              |
|----------|-----------|--------------|-----------|--------------|-----------|--------------|-----------|--------------|
|          | Counts    | Fraction (%) |
| K-rich   | 103275    | 32.7         | 1486      | 30.8         | 33319     | 26.8         | 4291      | 25.2         |
| BB       | 58379     | 18.5         | 1731      | 35.9         | 23970     | 19.3         | 4562      | 26.8         |
| OC       | 37856     | 12.0         | 744       | 15.4         | 19227     | 15.5         | 2138      | 12.5         |
| Ammonium | 39388     | 12.5         | 240       | 5.0          | 12948     | 10.4         | 1304      | 7.7          |
| Aged EC  | 35143     | 11.1         | 245       | 5.1          | 9553      | 7.7          | 1077      | 6.3          |
| Dust     | 28002     | 8.9          | 176       | 3.6          | 20613     | 16.6         | 2827      | 16.6         |

86

87 Table S2. Peak searching criteria for selected indicator species.

|                     | Indicator species | $m/z$         | Restrictive condition |
|---------------------|-------------------|---------------|-----------------------|
| Secondary organic   | $C_2H_3O^+$       | 43            | Relative area > 0.02  |
|                     | $HC_2O_4^-$       | -89           | -                     |
| Secondary inorganic | $NH_4^+$          | 18            | Relative area > 0.05  |
|                     | $HSO_4^-$         | -97           | Relative area > 0.1   |
|                     | $NO_3^-$          | -62           | Relative area > 0.1   |
| Primary marker      | $Cl^-$            | -35, -37      | and                   |
|                     | Levogluconan      | -45, -59, -71 | or                    |

88

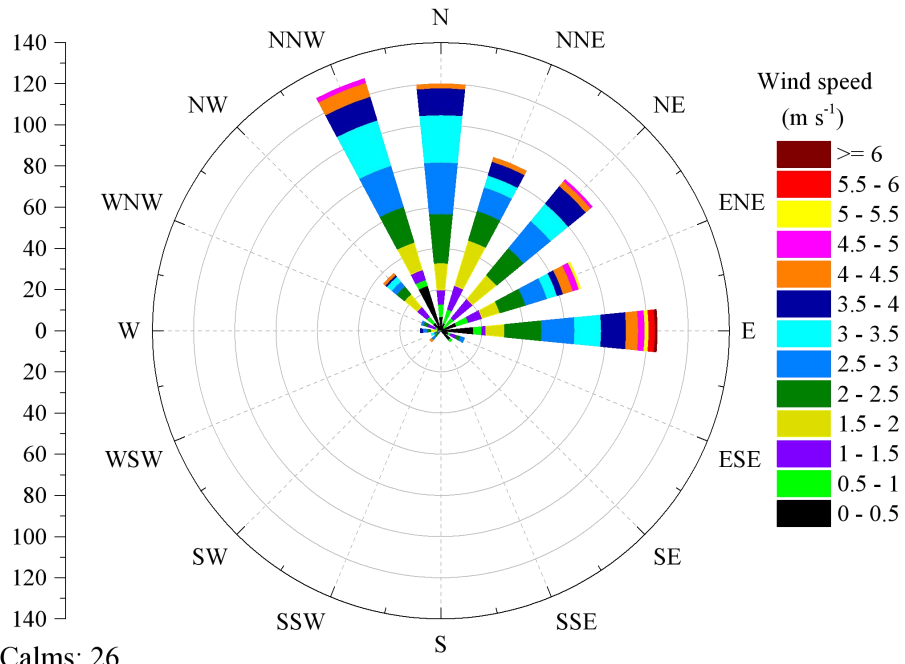

Calms: 26

Direction Wind

89

90

Figure S1. Wind rose of wind direction and wind speed (color bar) during the study period.



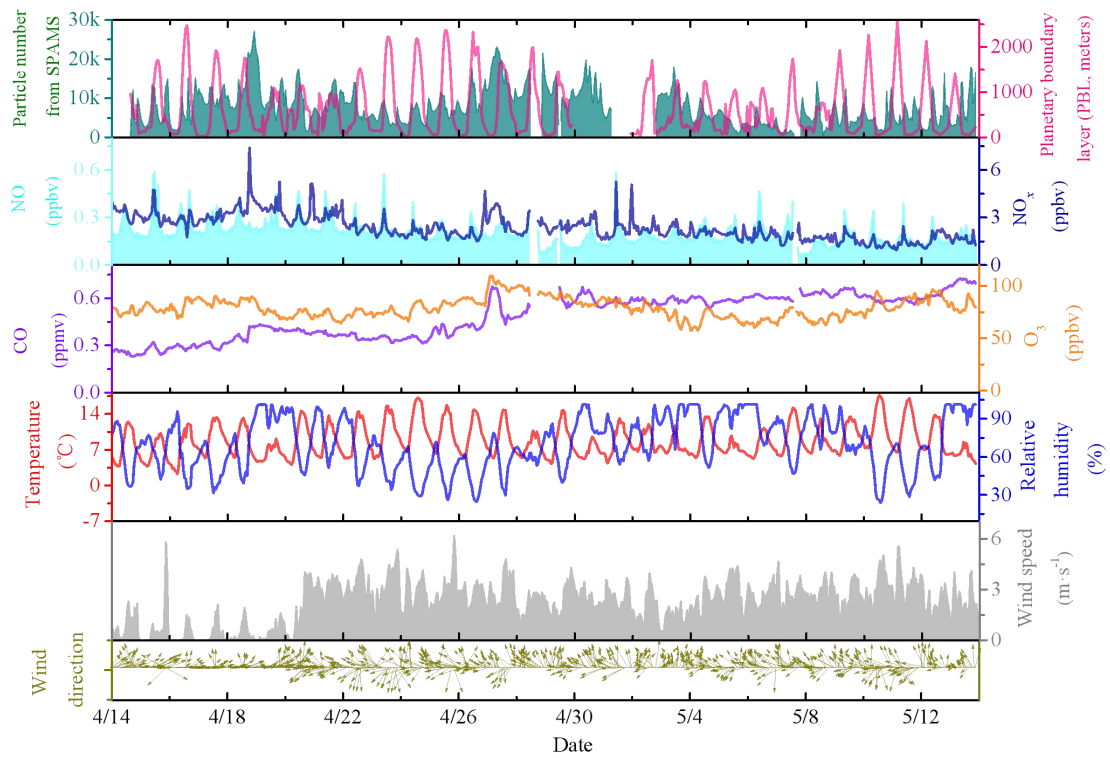

91

92 Figure S2. Time series of SPAMS particles, gaseous concentrations (i.e., NO, NO<sub>x</sub>, O<sub>3</sub>, and CO)  
 93 and meteorological parameters (planetary boundary layer height, temperature, relative humidity,  
 94 wind direction, and wind speed).

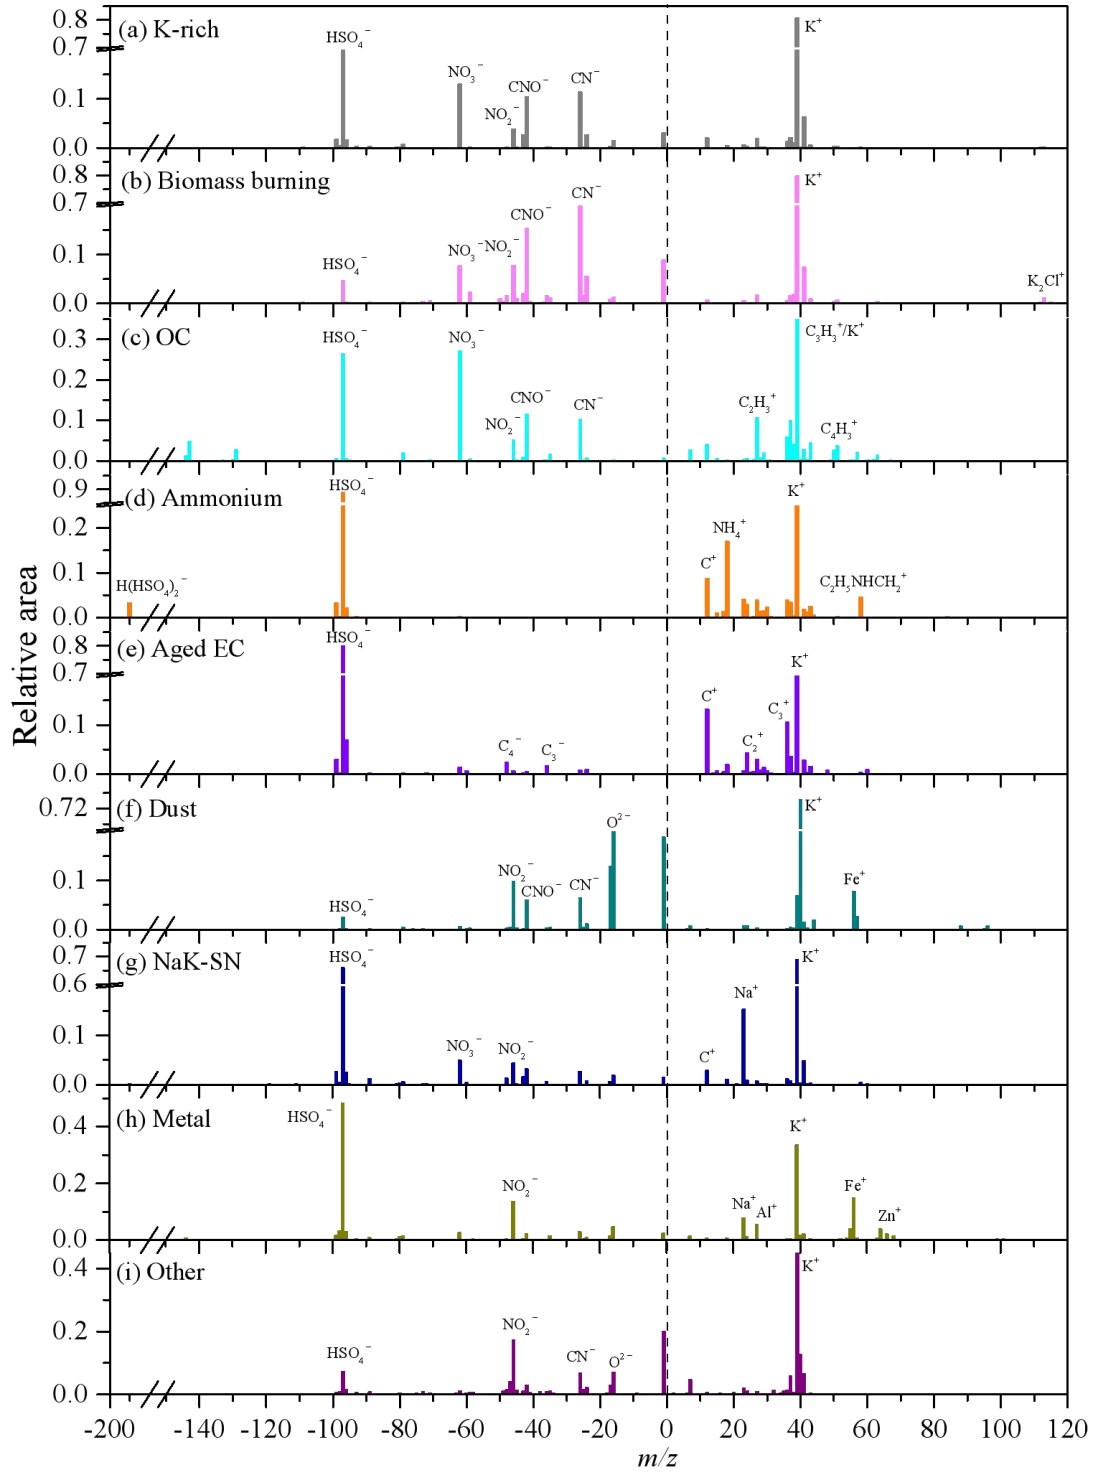

95

96 Figure S3. The average mass spectra of the major six particle types: (a) rich-potassium (K), (b)  
 97 Biomass burning (BB), (c) Organic carbon (OC), (d) Ammonium, (e) Aged element carbon (EC),  
 98 (f) Dust; and the relatively low contributions (< 3%) types of (g) Sodium, Potassium (NaK)-SN, (h)  
 99 Metal, (i) Other.

100

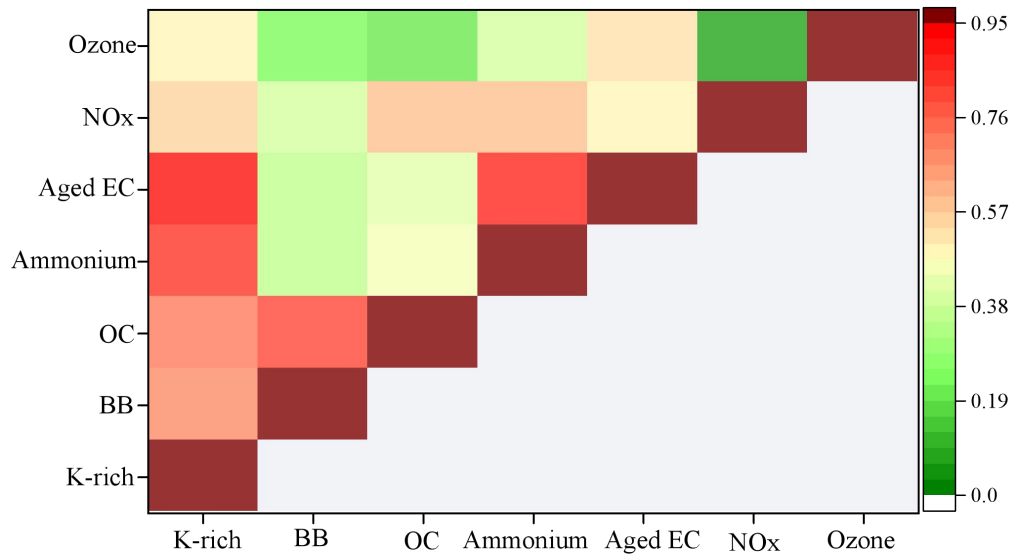

101

102 Figure S4. The correlation results between seven variables ( $p < 0.01$ ) was statistically analyzed by  
 103 IBM SPSS software (version 23). The values in the figure represent Pearson's  $r$ .

104

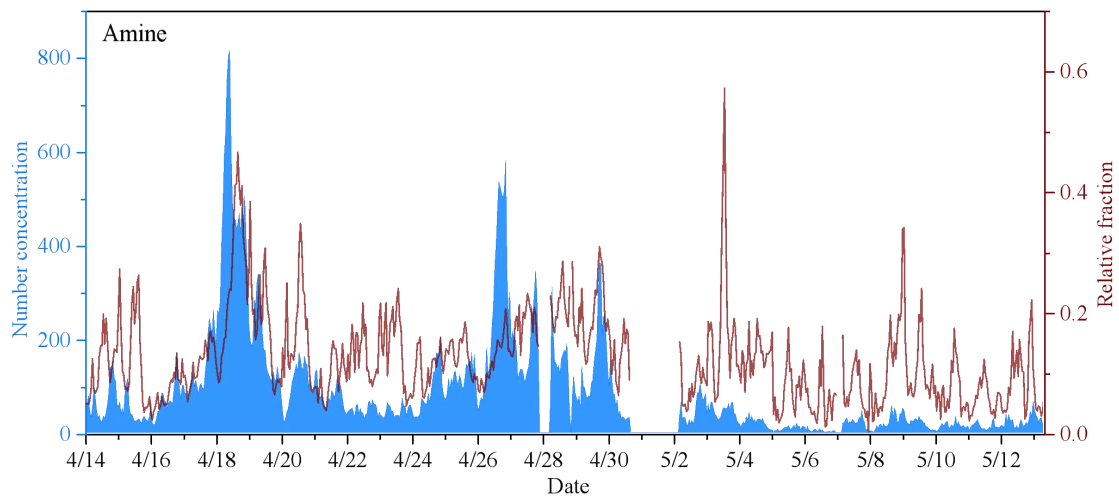

105

106

107

Figure S5. Time-series of the number concentrations (blue area) and the relative fraction (dark red line) of Amine-containing particles during the observation periods.

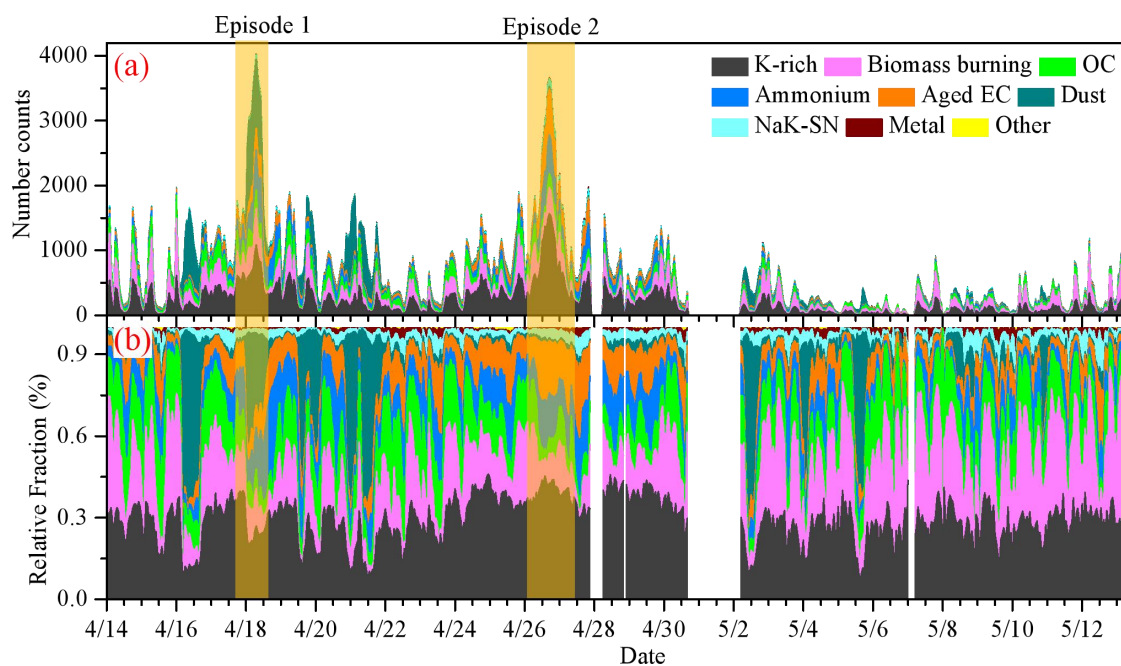

108

109 Figure S6. Time-series plots of (a) the number concentrations and (b) the relative fraction of nine  
 110 particle groups during the observation periods. Particle type abbreviations as in supplementary of  
 111 section 1. The two yellow shades regions correspond to Episode 1 and 2, respectively.

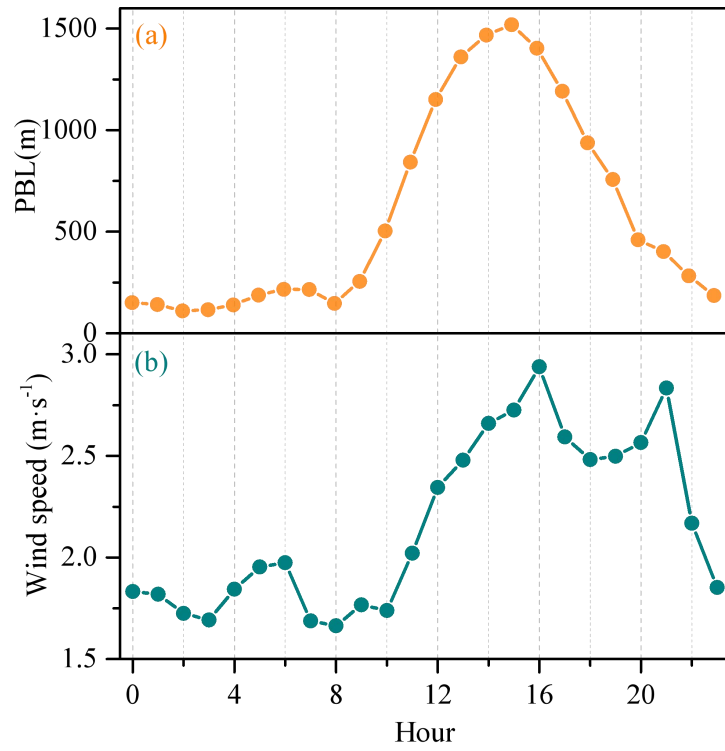

112

113 Figure S7. Diurnal variation of the (a) planetary boundary layer (PBL) and (b) wind speed (WS)  
114 during the entire observation period.

115

116

117

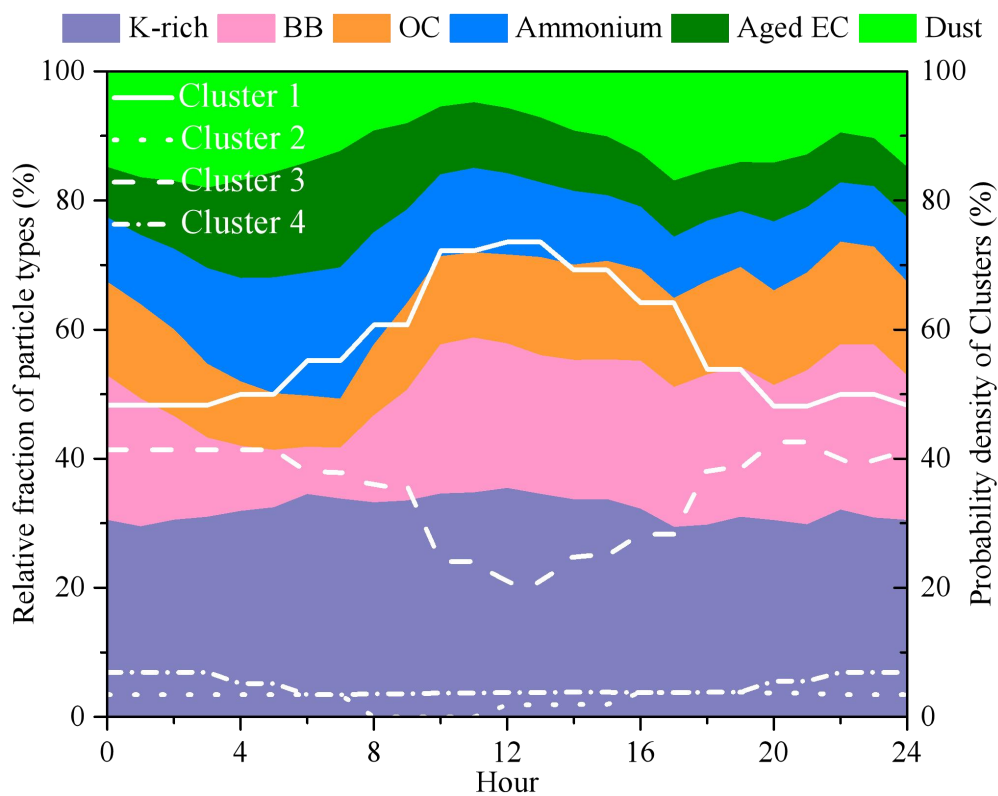

118

119 Figure S8. Diurnal variation of the relative fraction of the six major particle types and the  
120 probability density of the four clusters during entire observation period. The white lines represent  
121 the probability densities for the four air clusters.

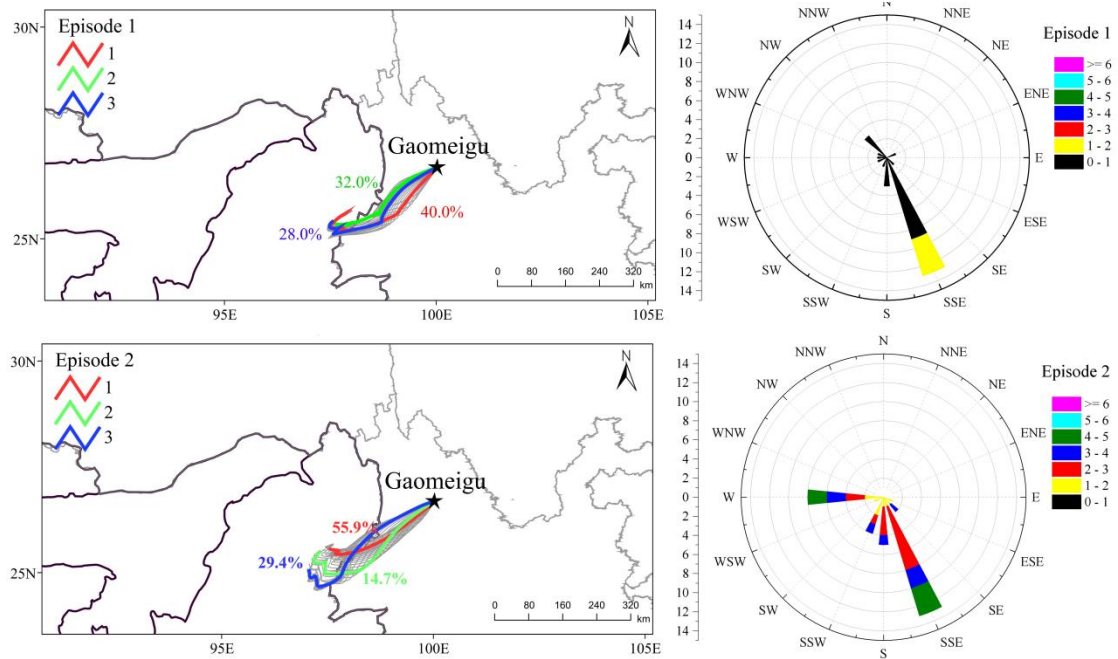

122  
 123  
 124  
 125  
 126

Figure S9. Maps of the mean HYSPLIT back trajectory clusters (72 h) at the height of 500 m during the Episode 1 (from 08:00 LT April 18<sup>th</sup> to 08:00 LT April 19<sup>th</sup> 2019) and Episode 2 (from 17:00 LT April 26<sup>th</sup> to 02:00 LT April 28<sup>th</sup> ), and the wind speed and direction.



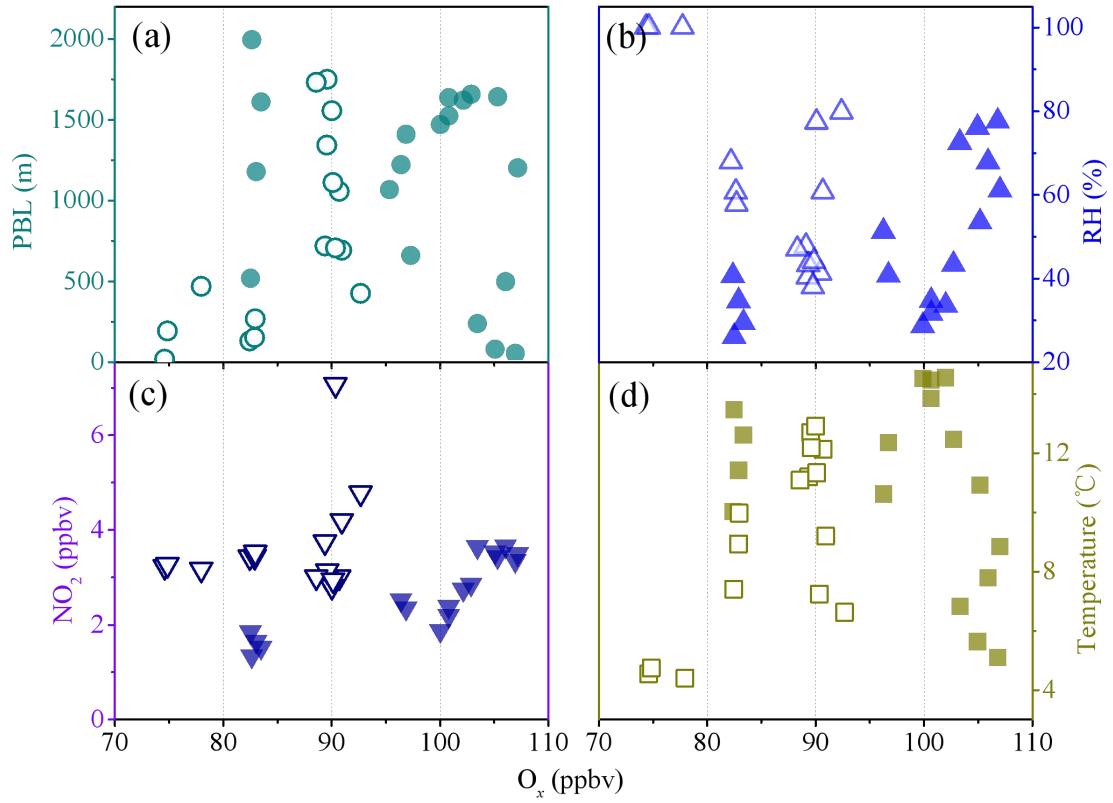

127

128 Figure S10. Correlations between oxidant ( $O_x$ ) concentration and (a) PBL, (b) RH, (c)  $NO_2$   
 129 concentration, and (d) temperature during the Episode 1 (the open shape) and Episode 2 (the solid  
 130 shape).

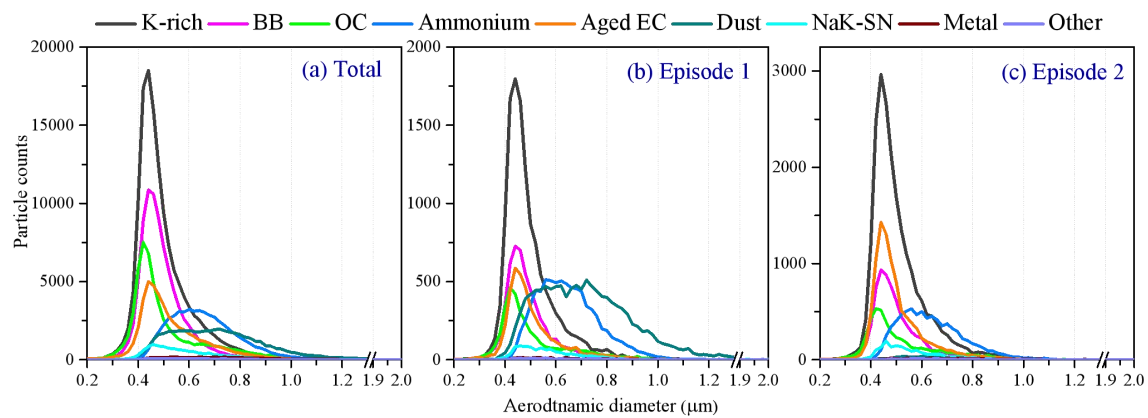

131  
 132  
 133  
 134

Figure S11. SPAMS-specific size distributions of the number concentrations of the nine particle types during (a) the total observation periods and two episodes of (b) E1 and (c) E2.

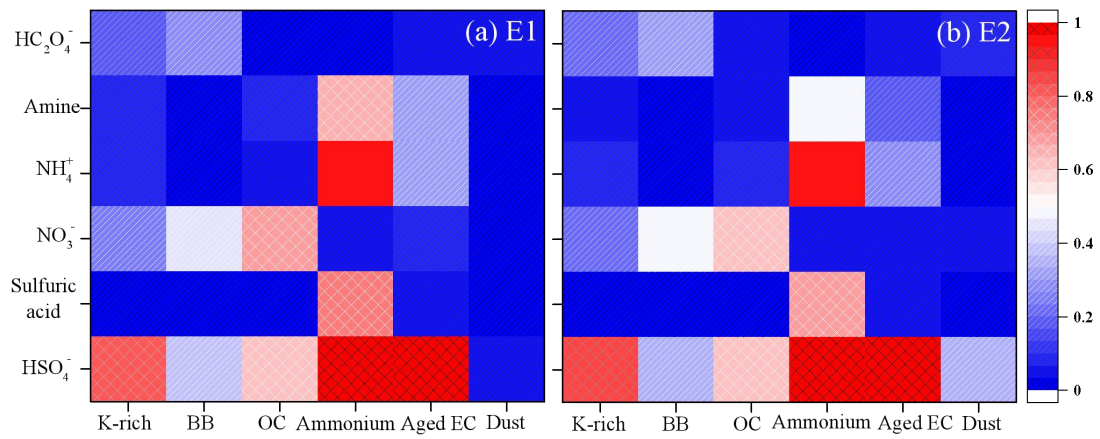

135

136 Figure S12. Number fractions of secondary markers associated with the six particle types (K-rich,  
 137 BB, OC, ammonium, aged EC, dust) in two episodes of E1 and E2: sulfate ( $^{97}\text{HSO}_4^-$ ), sulfuric  
 138 acid ( $^{195}\text{H}(\text{HSO}_4)_2^-$ ), nitrate ( $^{62}\text{NO}_3^-$ ), ammonium ( $^{18}\text{NH}_4^+$ ), amine ( $^{58}\text{C}_2\text{H}_5\text{NHCH}_2^+$ ), and oxalate  
 139 ( $^{89}\text{HC}_2\text{O}_4^-$ ).

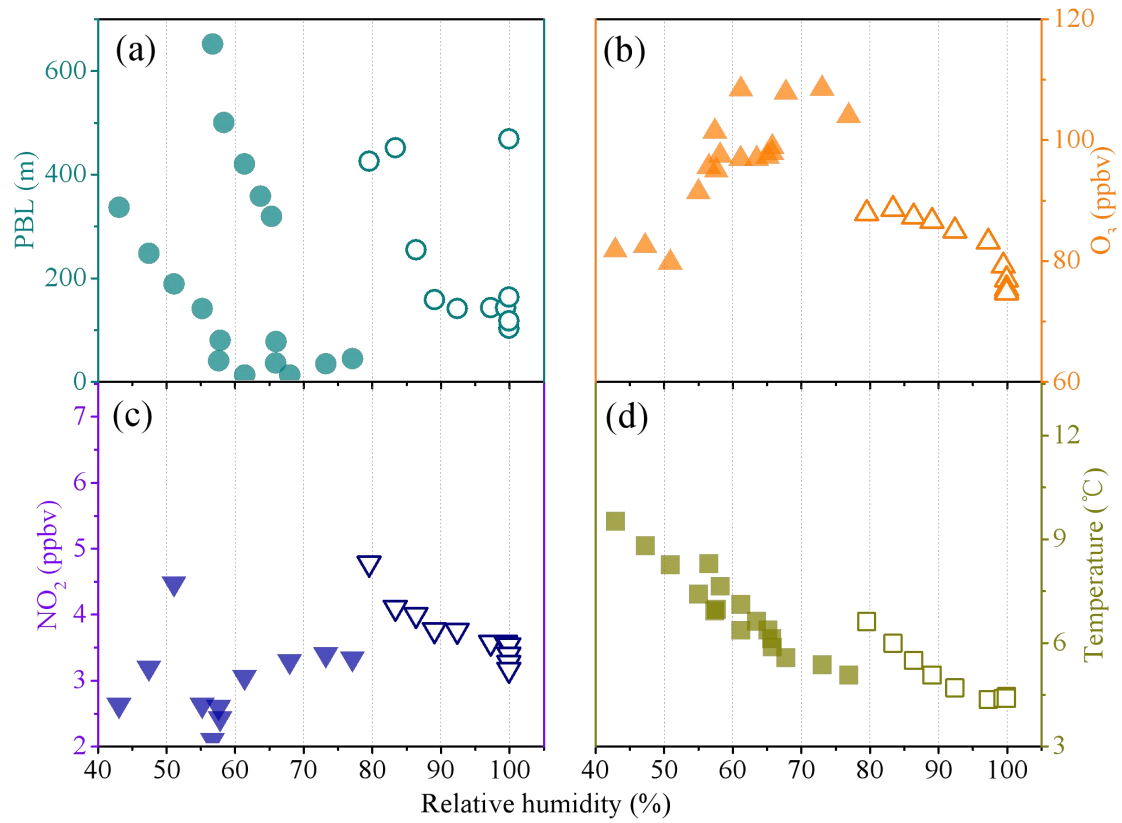

140

141 Figure S13. Correlations between RH and (a) PBL height, (b) O<sub>3</sub> concentration, (c) NO<sub>2</sub>

142 concentration, and (d) temperature during the Episode 1 (the open shape) and Episode 2 (the solid

143 shape).

144

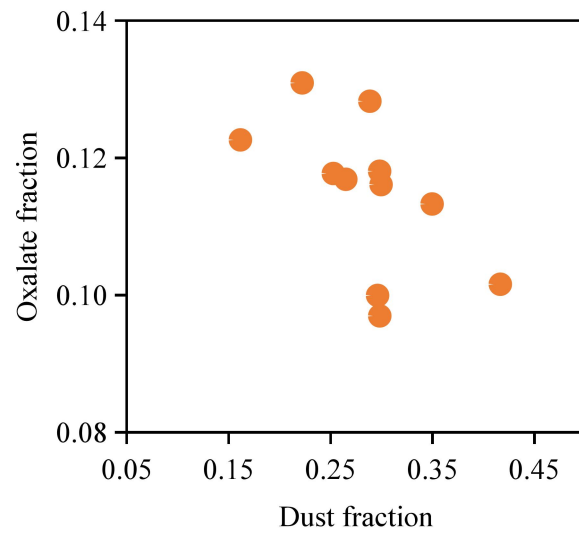

145

146 Figure S14. Correlations between the relative fraction of oxalate and Dust type during  
147 E1.

148

149

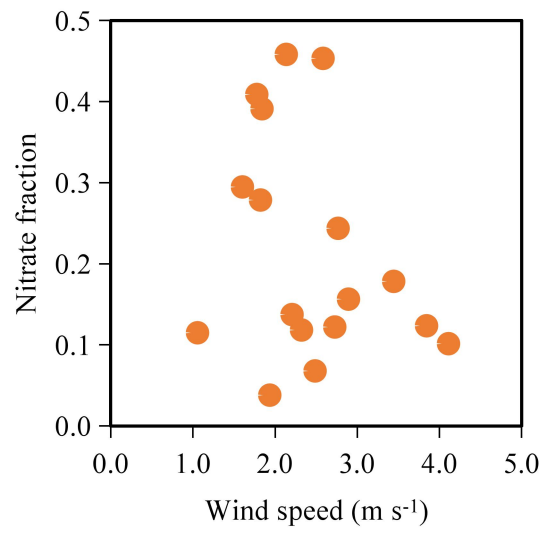

150

151 Figure S15. Correlations between the relative fraction of nitrate ( $^{62}\text{NO}_3^-$ ) and wind  
152 speed during E2.

153

154

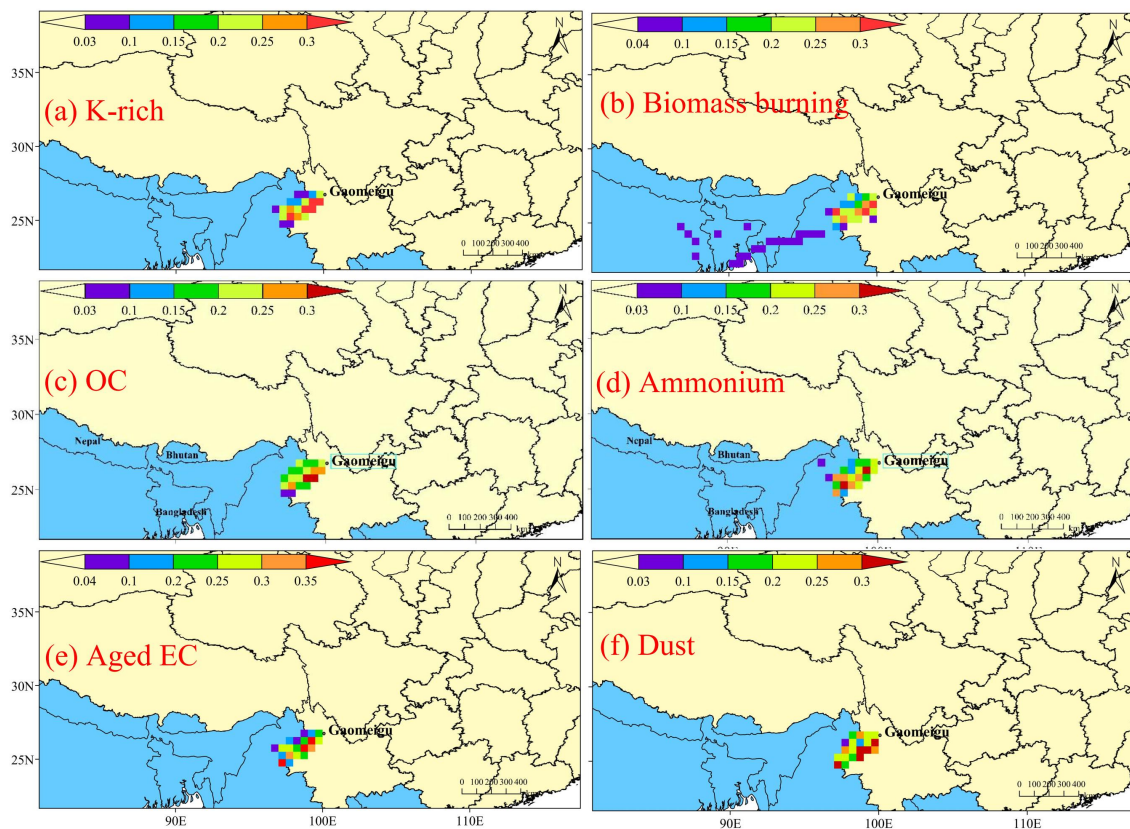

155

156 Figure S16. Maps of the potential source contribution functions for (a) K-rich, (b) Biomass  
 157 burning, (c) OC, (d) Ammonium, (e) Aged EC, and (f) Dust particles; the 75<sup>th</sup> percentile was 309,  
 158 194, 127, 101, 84 and 84, respectively.

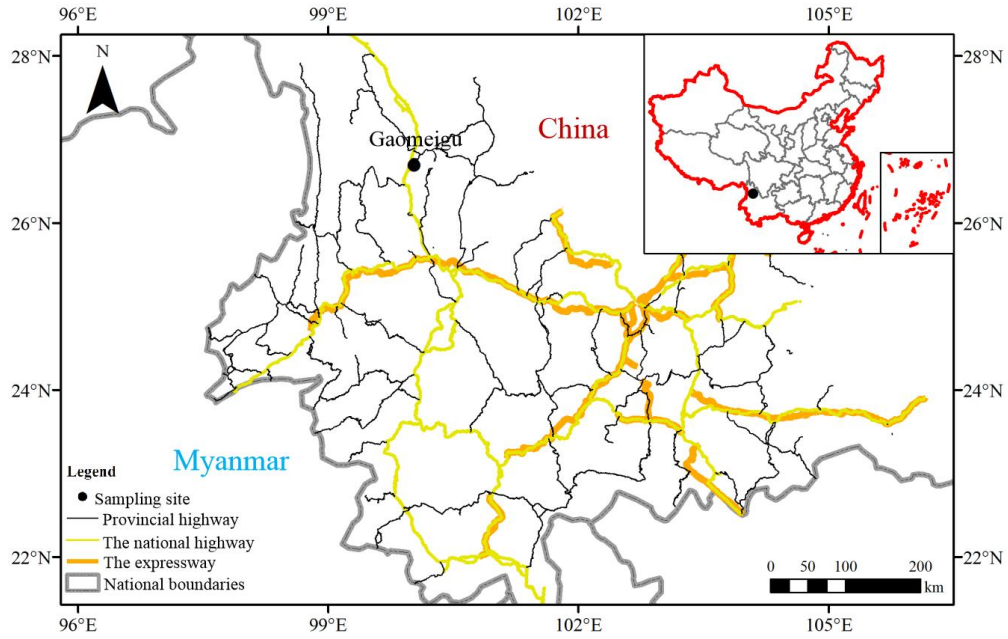

159

160 Figure S17. Map of highway distribution near sampling sites from ArcGis10.6 software; dataset  
 161 acquired from Global Roads Inventory Project (GRIP): global roads database  
 162 (<https://www.globio.info/resources>). The GRIP dataset consists of global and regional vector  
 163 datasets in ESRI filegeodatabase and shapefile format, and global raster datasets of road density at  
 164 a 5 arcminutes resolution ( $\sim 8 \times 8$  km).



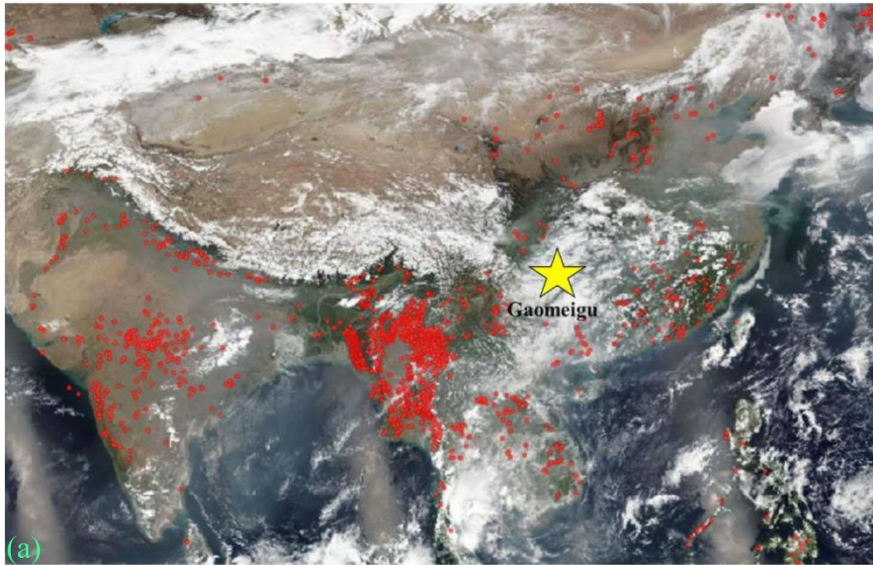

165

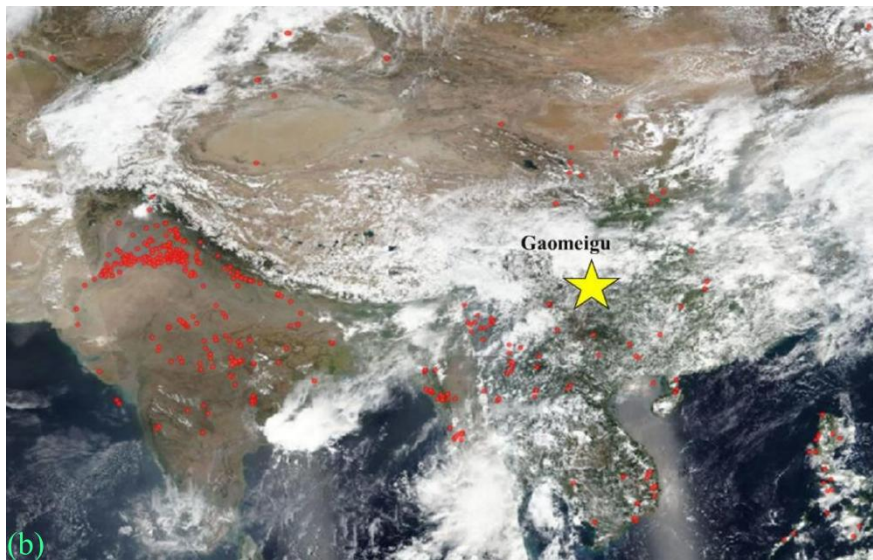

166

167 Figure S18. Monthly average fire site maps for (b) April 2018, and (c) May 2018. The fire site  
168 maps are from © NASA (National Aeronautics and Space Administration)  
169 (<https://www.nasa.gov/image-feature/goddard/2018/a-world-on-fire>).

170 **Reference**

- 171 Bi, X. H., Zhang, G. H., Li, L., Wang, X. M., Li, M., Sheng, G. Y., Fu, J. M., and Zhou, Z.:  
172 Mixing state of biomass burning particles by single particle aerosol mass spectrometer in the  
173 urban area of PRD, China, *Atmos. Environ.*, 45, 3447–3453,  
174 <https://doi.org/10.1016/j.atmosenv.2011.03.034>, 2011.
- 175 Bond, T. C., Doherty, S. J., Fahey, D. W., Forster, P. M., Bernsten, T., DeAngelo, B. J., Flanner, M.  
176 G., Ghan, S., Kärcher, B., Koch, D., Kinne, S., Kondo, Y., Quinn, P. K., Sarofim, M. C.,  
177 Schultz, M. G., Schulz, M., Venkataraman, C., Zhang, H., Zhang, S., Bellouin, N.,  
178 Guttikunda, S. K., Hopke, P. K., Jacobson, M. Z., Kaiser, J. W., Klimont, Z., Lohmann, U.,  
179 Schwarz, J. P., Shindell, D., Storelvmo, T., Warren, S. G., and Zender, C. S.: Bounding the  
180 role of black carbon in the climate system: a scientific assessment, *J. Geophys. Res. Atmos.*,  
181 118, 5380–5552, <https://doi.org/10.1002/jgrd.50171>, 2013.
- 182 Cadle, S. H., and Mulawa, P. A.: Low-molecular-weight aliphatic amines in exhaust from  
183 catalyst-equipped cars, *Environ. Sci. Technol.*, 14 (6), 718–723,  
184 <https://doi.org/10.1021/es60166a011>, 1980.
- 185 Cahill, J. F., Suski, K., Seinfeld, J. H., Zaveri, R. A., and Prather, K. A.: The mixing state of  
186 carbonaceous aerosol particles in northern and southern California measured during CARES  
187 and CalNex 2010, *Atmos. Chem. Phys.*, 12, 10989–11002,  
188 <https://doi.org/10.5194/acp-12-10989-2012>, 2012.
- 189 Dall’Osto, M., and Harrison, R. M.: Urban organic aerosols measured by single particle mass  
190 spectrometry in the megacity of London, *Atmos. Chem. Phys.*, 12, 4127–4142,  
191 <https://doi.org/10.5194/acp-12-4127-2012>, 2012.
- 192 Gross, D. S., Gälli, M. E., Siliva, P. J., and Prather, K. A.: Relative sensitivity factors for alkali  
193 metal and ammonium cations in single-particle aerosol time-of-flight mass spectra, *Anal.*  
194 *Chem.*, 72, 416–422, <https://doi.org/10.1021/ac990434g>, 2000.
- 195 Giorio, C., Tapparo, A., Dall’Osto, M., Beddows, D. C. S., Esser-Gietl, J. K., Healy, R. M., and  
196 Harrison, R. M.: Local and Regional Components of Aerosol in a Heavily Trafficked Street  
197 Canyon in Central London Derived from PMF and Cluster Analysis of Single-Particle  
198 ATOFMS Spectra, *Environ. Sci. Technol.*, 49(6), 3330–3340,  
199 <https://doi.org/10.1021/es506249z>, 2015.
- 200 Hatch, L. E., Creamean, J. M., Ault, A. P., Surratt, J. D., Chan, M. N., Seinfeld, J. H., Edgerton, E.  
201 S., Su, Y., Prather, K. A.: Measurements of Isoprene-Derived Organosulfates in Ambient  
202 Aerosols by Aerosol Time-of-Flight Mass Spectrometry—Part I: Single Particle Atmospheric  
203 Observations in Atlanta, *Environ. Sci. Technol.*, 45, 5105–5111,  
204 <https://doi.org/10.1021/es103944a>, 2011.
- 205 Healy, R. M., Sciare, J., Poulain, L., Crippa, M., Wiedensohler, A., Prévôt, A.S.H., Baltensperger,  
206 U., Sarda-Estève, R., McGuire, M. L., Jeong, C. H., McGillicuddy, E., O’Connor, I. P.,  
207 Sodeau, J. R., Evans, G. J., and Wenger, J. C.: Quantitative determination of carbonaceous  
208 particle mixing state in Paris using single-particle mass spectrometer and aerosol mass  
209 spectrometer measurements, *Atmos. Chem. Phys.*, 13, 9479–9496,  
210 <http://dx.doi.org/10.5194/acp-13-9479-2013>, 2013.
- 211 Lall, R., and Thurston, G.D.: Identifying and quantifying transported vs. local sources of new York  
212 City PM<sub>2.5</sub> fine particulate matter air pollution, *Atmos Environ.*, 40, 333–346,

213 <https://doi.org/10.1016/j.atmosenv.2006.04.068>, 2006.

214 Li, L., Li, M., Huang, Z. X., Gao, W., Nian, H. Q., Fu, Z., Gao, J., Chai, F. H., and Zhou, Z.:  
215 Ambient particle characterization by single particle aerosol mass spectrometry in an urban  
216 area of Beijing, *Atmos. Environ.*, **94**, 323–331,  
217 <https://doi.org/10.1016/j.atmosenv.2014.03.048>, 2014.

218 Li, C. L., Bosch, C., Kang, S. C., Andersson, A. Chen., P. F., Zhang, Q. G., Cong., Z. Y., Chen, B.,  
219 Qin., D. H., and Gustafsson., Ö.: Sources of black carbon to the Himalayan–Tibetan Plateau  
220 glaciers, *Nat. Commun.*, **7**, 12574, <https://doi.org/10.1038/ncomms12574>, 2016.

221 Lin, Q. H., Zhang, G. H., Peng, L., Bi, X. H., Wang, X. M., Brechtel, F. J., Li, M., Chen, D. H.,  
222 Peng, P. A., Sheng, G. Y., Zhou, Z.: In situ chemical composition measurement of individual  
223 cloud residue particles at a mountain site, southern China, *Atmos. Chem. Phys.*, **17**,  
224 8473–8488, <https://doi.org/10.5194/acp-17-8473-2017>, 2017.

225 Liu, H. K., Wang, Q. Y., Xing, L., Zhang, Y., Zhang, T., Ran, W. K., and Cao, J. J.: Measurement  
226 report: quantifying source contribution of fossil fuels and biomass-burning black carbon  
227 aerosol in the southeastern margin of the Tibetan Plateau, *Atmos. Chem. Phys.*, **21**, 973–987,  
228 <https://doi.org/10.5194/acp-21-973-2021>, 2021.

229 Moffet, R. C., Foy, B. D., Molina, L. A., Molina, M. J., Prather, K. A.: Measurement of ambient  
230 aerosols in northern Mexico City by single particle mass spectrometry. *Atmos. Chem. Phys.*,  
231 **8** (16), 4499–4516, <https://doi.org/10.5194/acpd-7-6413-2007>, 2008.

232 Moffet, R. C., and Prather, K.A.: In-situ measurements of the mixing state and optical properties  
233 of soot with implications for radiative forcing estimates, *P. Natl. Acad. Sci. USA*, **106**,  
234 11872–11877, <https://doi.org/10.1073/pnas.0900040106>, 2009.

235 Pratt, K. A., Murphy, S. M., Subramanian, R., DeMott, P. J., Kok, G. L., Campos, T., Rogers, D.  
236 C., Prenni, A. J., Heymsfield, A. J., Seinfeld, J. H., and Prather, K. A.: Flight-based chemical  
237 characterization of biomass burning aerosols within two prescribed burn smoke plumes,  
238 *Atmos. Chem. Phys.*, **11**, 12549–12565, <https://doi.org/10.5194/acp-11-12549-2011>, 2011.

239 Rehbein, P. J., Jeong, C. H., McGuire, M. L., Yao, X., Corbin, J. C., and Evans, G. J.: Cloud and  
240 fog processing enhanced gas-toparticle partitioning of trimethylamine, *Environ. Sci. Technol.*,  
241 **45**, 4346–4352, <https://doi.org/10.1021/es1042113>, 2011.

242 Seinfeld, J. H., and Pandis, S. N.: *Atmospheric Chemistry and Physics: from Air Pollution to*  
243 *Climate Change*, John Wiley & Sons., 1326.  
244 <https://doi.org/10.1080/00139157.1999.10544295>, 2012.

245 Shen, L. J., Wang, H. L., Lü, S., Zhang, X. H., Yuan, J., Tao, S. K., Zhang, G. J., Wang, F., and Li,  
246 L.: Influence of pollution control on air pollutants and the mixing state of aerosol particles  
247 during the 2nd World Internet Conference in Jiaxing, China, *J. Clean. Prod.*, **149**, 436–447,  
248 <https://doi.org/10.1016/j.jclepro.2017.02.114>, 2017.

249 Silva, P. J., Liu, D.Y., Noble, C.A., and Prather, K. A.: Size and chemical characterization of  
250 individual particles resulting from biomass burning of local Southern California species,  
251 *Environ. Sci. Technol.*, **33**, 3068–3076, <https://doi.org/10.1021/es980544p>, 1999.

252 Silva, P. J. and Prather K. A.: Interpretation of mass spectra from organic compounds in aerosol  
253 time-of-flight mass spectrometry, *Anal. Chem.*, **72**, 3553–3562,  
254 <https://doi.org/10.1021/ac9910132>, 2000.

255 Sun, Y. L., Zhang, Q., Schwab, J. J., Yang, T., Ng, N. L., and Demerjian, K. L.: Factor analysis of  
256 combined organic and inorganic aerosol mass spectra from high resolution aerosol mass

257 spectrometer measurements, *Atmos. Chem. Phys.*, 12, 8537–8551,  
258 <https://doi.org/10.5194/acp-12-8537-2012>, 2012.

259 Xu, J., Li, M., Shi, G., Wang, H., Ma, X., Wu, J., Shi, X., and Feng, Y.: Mass spectra features of  
260 biomass burning boiler and coal burning boiler emitted particles by single particle aerosol  
261 mass spectrometer, *Sci. Total Environ.*, 598, 341–352,  
262 <https://doi.org/10.1016/j.scitotenv.2017.04.132>, 2017.

263 Xu, L. L., Wu, X., Hong, Z. Y., Zhang, Y. R., Deng, J. J., Hong, Y. W., and Chen, J. S.:  
264 Composition, mixing state, and size distribution of single submicron particles during  
265 pollution episodes in a coastal city in southeast China, *Environ. Sci. Pollut. Res.*, 26,  
266 1464–1473, <https://doi.org/10.1007/s11356-018-3469-x>, 2018.

267 Yang, J., Ma, S. X., Gao, B., Li, X. Y., Zhang, Y. J., Cai, J., Li, M., Yao, L. A., Huang, B., and  
268 Zheng, M.: Single particle mass spectral signatures from vehicle exhaust particles and the  
269 source apportionment of on-line PM<sub>2.5</sub> by single particle aerosol mass spectrometry, *Sci.*  
270 *Total Environ.*, 593, 310–318, <https://doi.org/10.1016/j.scitotenv.2017.03.099>, 2017.

271 Yang, F., Chen, H., Du, J., Yang, X., Gao, S., Chen, J., and Geng, F.: Evolution of the mixing state  
272 of fine aerosols during haze events in Shanghai, *Atmos. Res.*, 104, 193–201,  
273 <https://doi.org/10.1016/j.atmosres.2011.10.005>, 2012.

274 Zhang, J. K., Luo, B., Zhang, J. Q., Ouyang, F., Song, H. Y., Liu, P. C., Cao, P., Schäfer, K., Wang,  
275 S. G., Huang, X. J., and Lin, Y. F.: Analysis of the characteristics of single atmospheric  
276 particles in Chengdu using single particle mass spectrometry, *Atmos. Environ.*, 157, 91–100,  
277 <https://doi.org/10.1016/j.atmosenv.2017.03.012>, 2017.

278
